# Supplementary material
Source: Frontiers journal article supplement (https://www.frontiersin.org/articles/528834)
Supplement: Image_1.PDF [file Image_1.PDF]

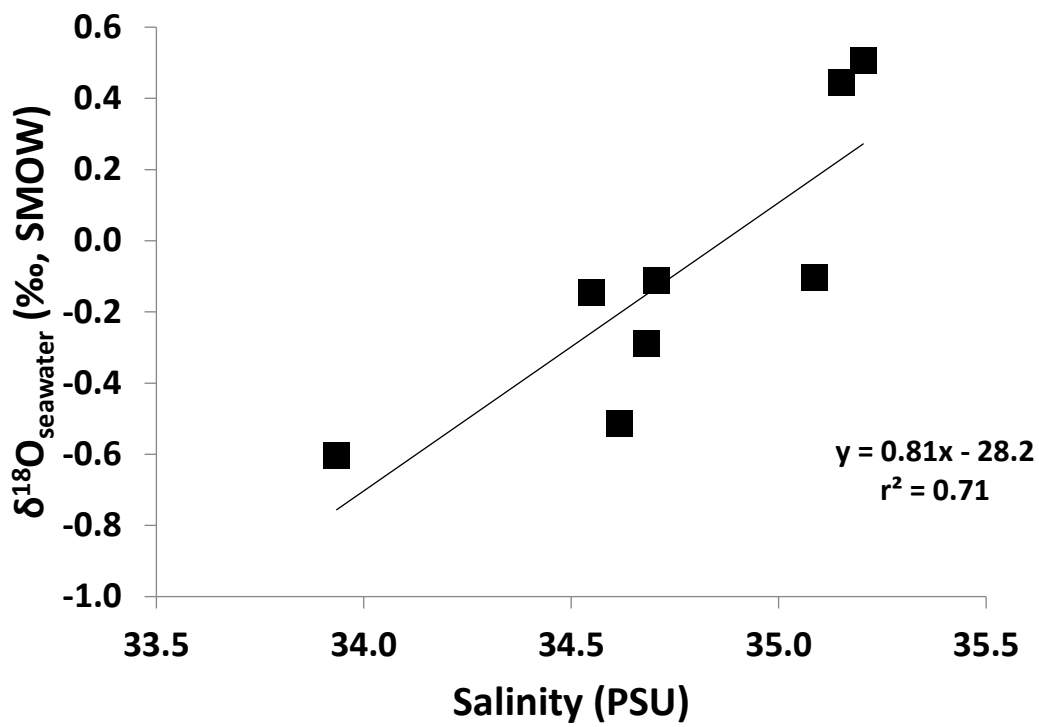

**Supplementary Figure S1.** Linear relationship between sea surface salinity and  $\delta^{18}\text{O}_{\text{sw}}$  in NW Australian coastal waters.
